# Supplementary material
Source: MDPI journal article supplement (https://www.mdpi.com/1424-8247/14/5/413)
Supplement: s1 [file s1]

**Supporting information for**  
**Study of cytotoxic and photodynamic activities of dyads composed of a zinc**  
**phthalocyanine appended to an organotin**

Isabelle Toubia,<sup>ac#</sup> Christophe Nguyen,<sup>b#</sup> Stéphane Diring,<sup>a</sup> Marine Pays,<sup>b</sup> Elodie Mattana,<sup>b</sup> Philippe Arnoux<sup>c</sup>, Céline Frochot,<sup>\*c</sup> Magali Gary-Bobo,<sup>\*b</sup> Marwan Kobeissi,<sup>\*d</sup> Fabrice Odobel<sup>\*a</sup>

<sup>a</sup>CEISAM, Chimie Et Interdisciplinarité, Synthèse, Analyse, Modélisation, CNRS, UMR CNRS 6230, UFR des Sciences et des Techniques ; 2, rue de la Houssinière - BP 92208; 44322 NANTES Cedex 3 (France). E-mail: [Fabrice.Odobel@univ-nantes.fr](mailto:Fabrice.Odobel@univ-nantes.fr)

<sup>b</sup>IBMM, Univ Montpellier, CNRS, ENSCM, Montpellier, France. E-mail: [magali.gary-bobo@inserm.fr](mailto:magali.gary-bobo@inserm.fr)

<sup>c</sup>LRGP, Laboratoire Réactions et Génie des Procédés, UMR 7274 CNRS-Université de Lorraine, 1 rue Grandville, 54000 Nancy, France. E-mail: [celine.frochot@univ-lorraine.fr](mailto:celine.frochot@univ-lorraine.fr)

<sup>d</sup>Laboratoire RammalRammal, Equipe de Synthèse Organique Appliquée SOA, Université Libanaise, Faculté des Sciences 5, Nabatieh, Liban. E-mail: [mkobeissi@ul.edu.lb](mailto:mkobeissi@ul.edu.lb)

<sup>#</sup>These authors contributed equally to this study.

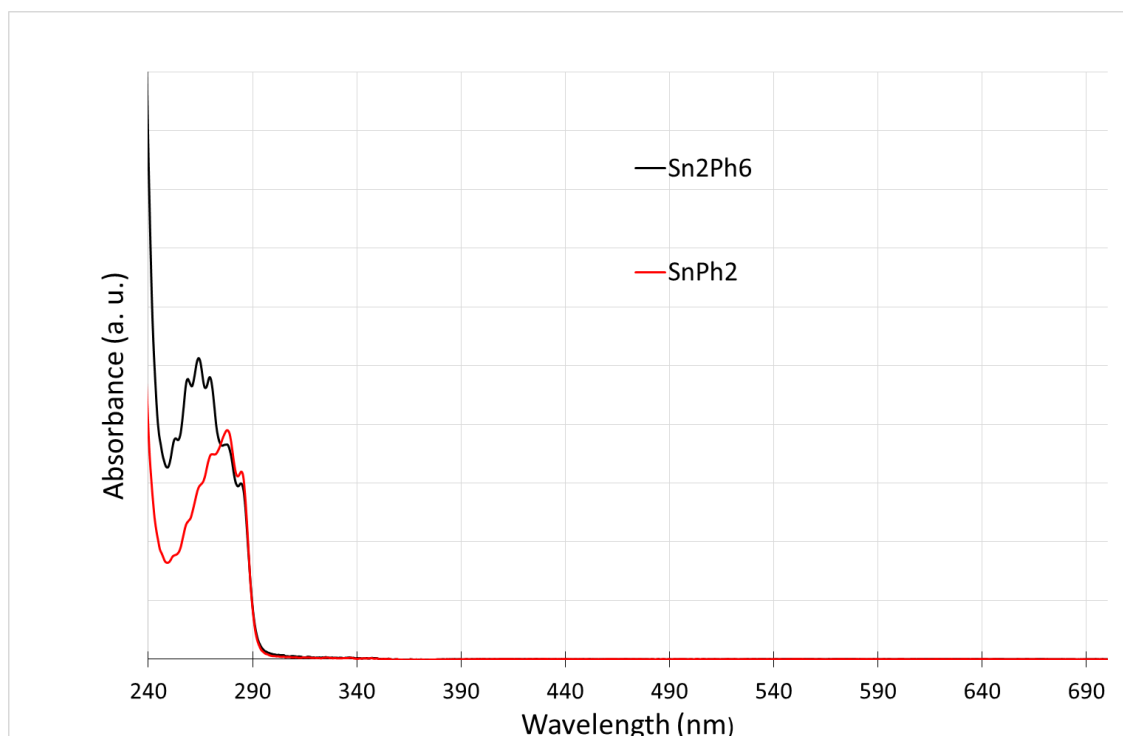

**Figure S1.** Overlay of the UV-Vis. absorption spectra of compounds **SnPh<sub>2</sub>** and **Sn<sub>2</sub>Ph<sub>6</sub>** recorded in dichloromethane.

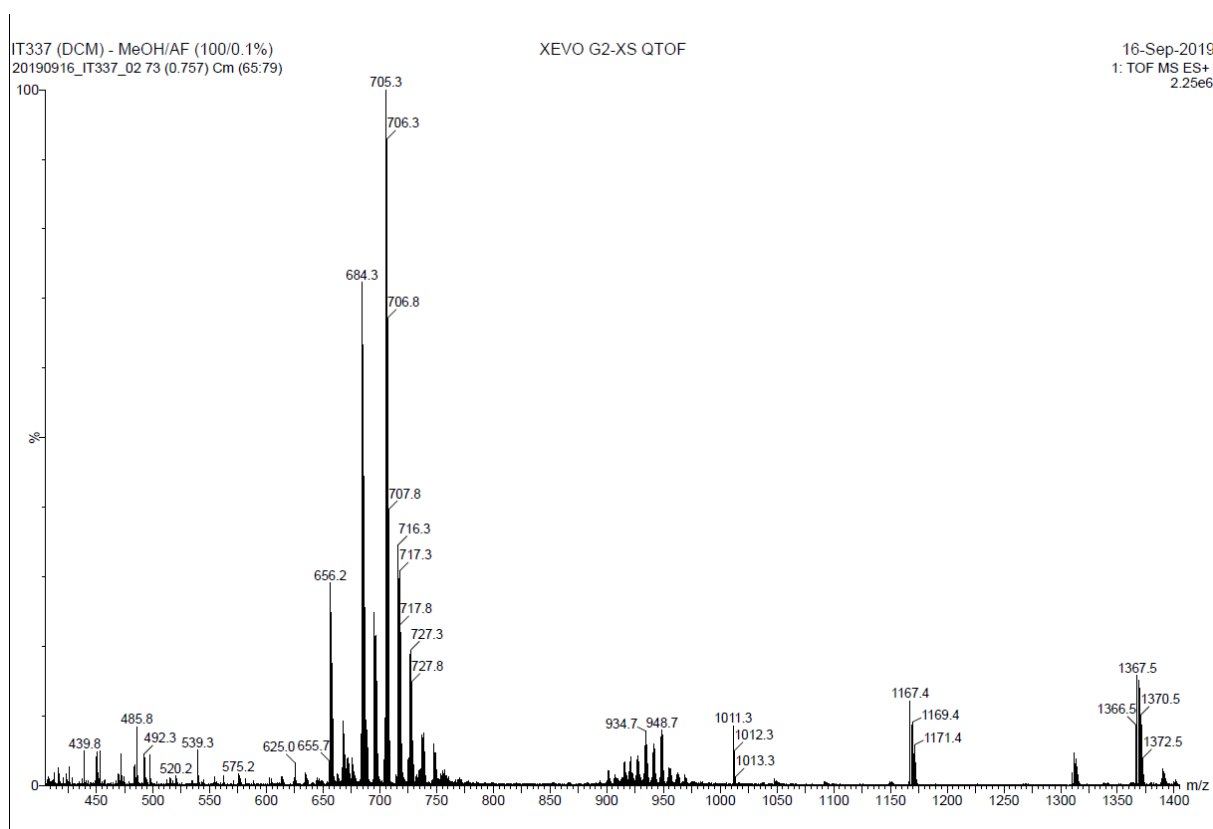

**Figure S2.** Mass spectrum of phthalocyanine 3.

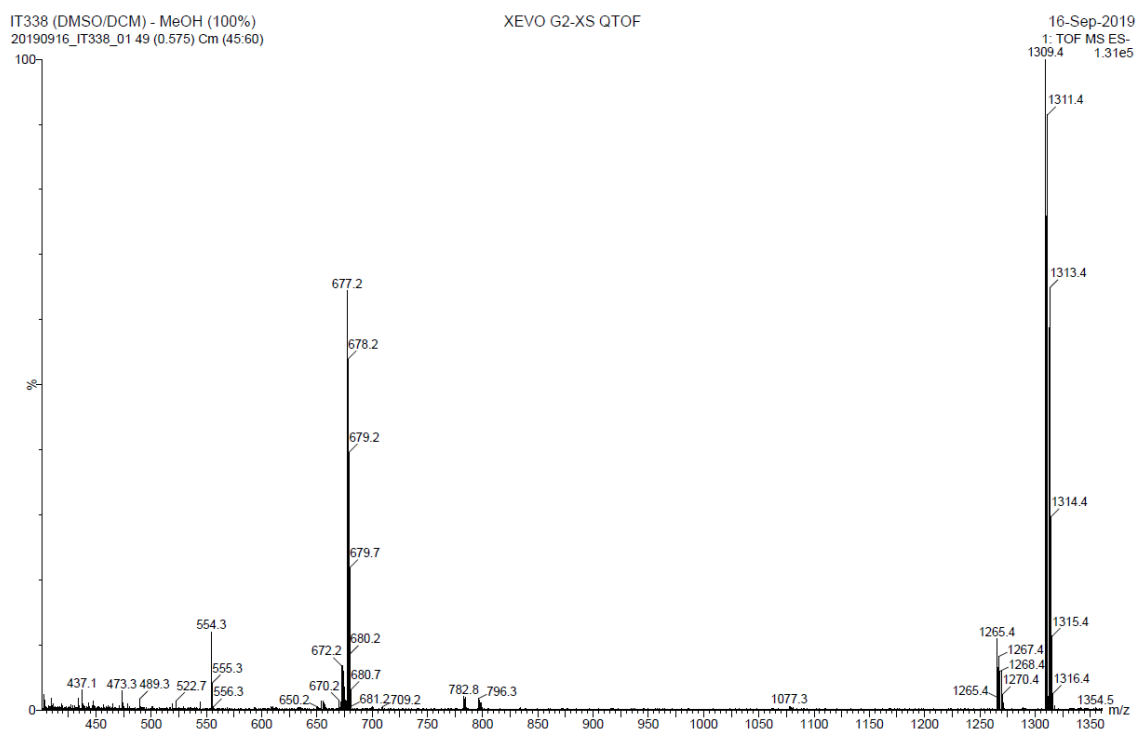

**Figure S3.** Mass spectrum of phthalocyanine 4.

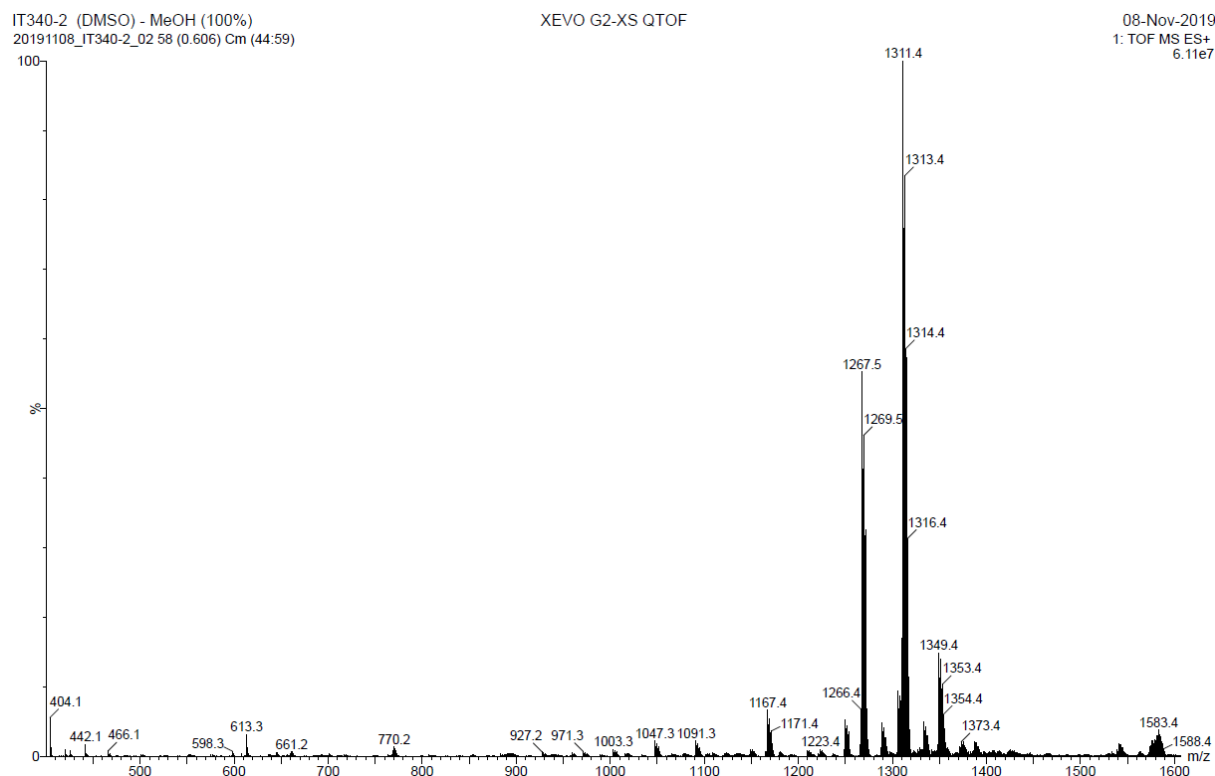

**Figure S4.** Mass spectrum of compound  $\text{ZnPcSnPh}_2$

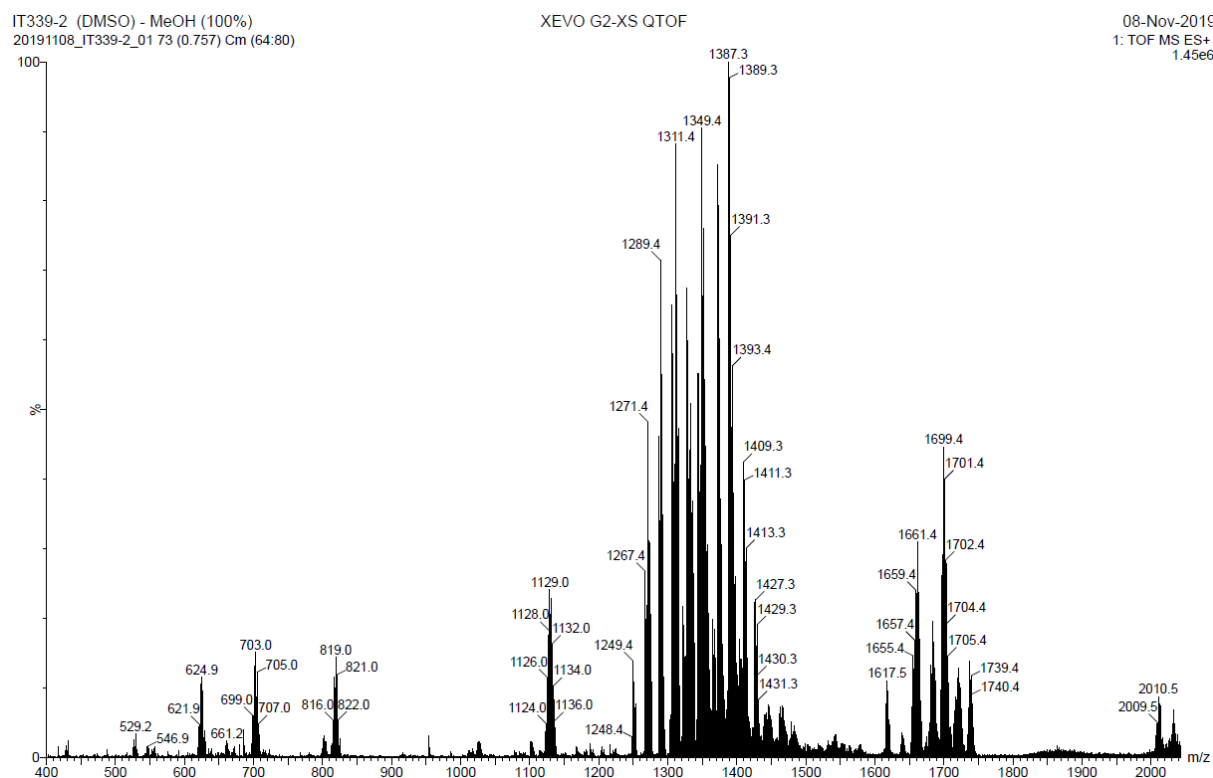

**Figure S5.** Mass spectrum of compound  $\text{ZnPcSn}_2\text{Ph}_6$

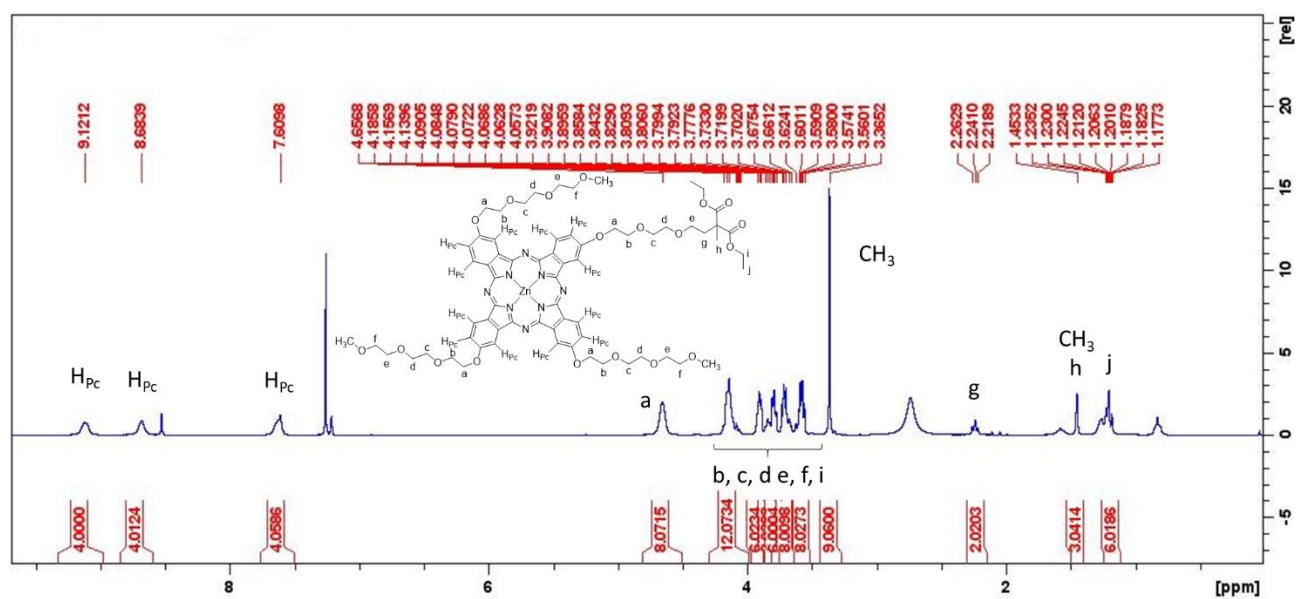

Figure S6. <sup>1</sup>H NMR spectrum of phthalocyanine **3** recorded in CDCl<sub>3</sub>.

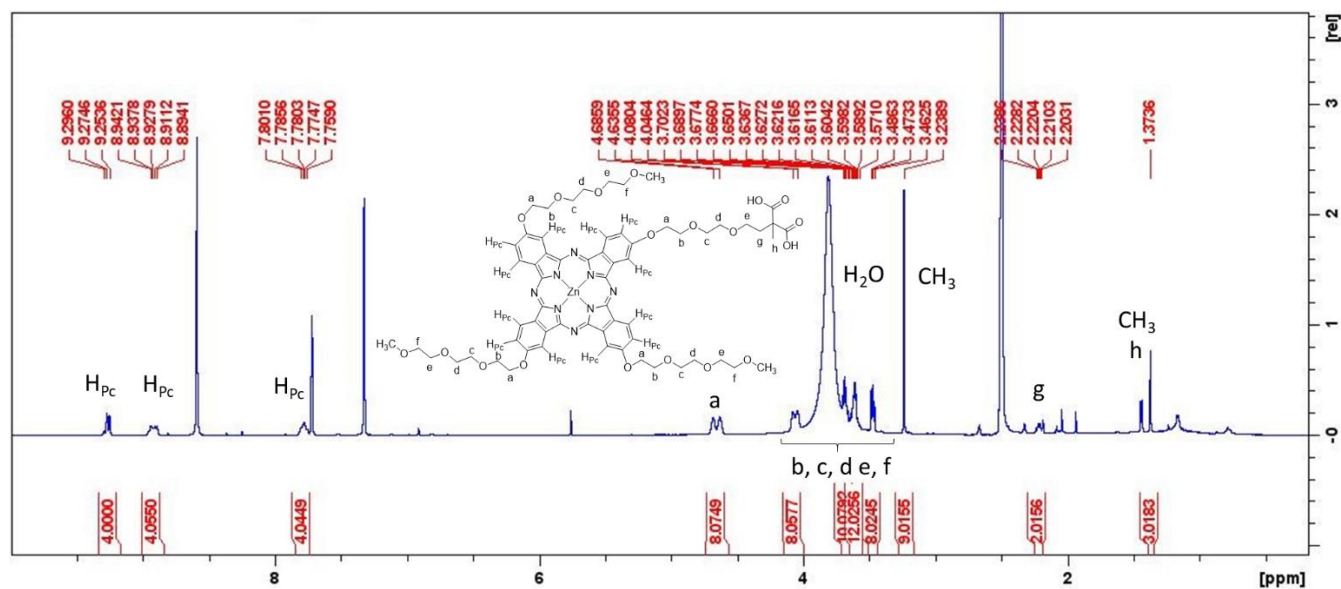

Figure S7. <sup>1</sup>H NMR spectrum of phthalocyanine **4** recorded in DMSO-d<sub>6</sub> with a trace of pyridine.

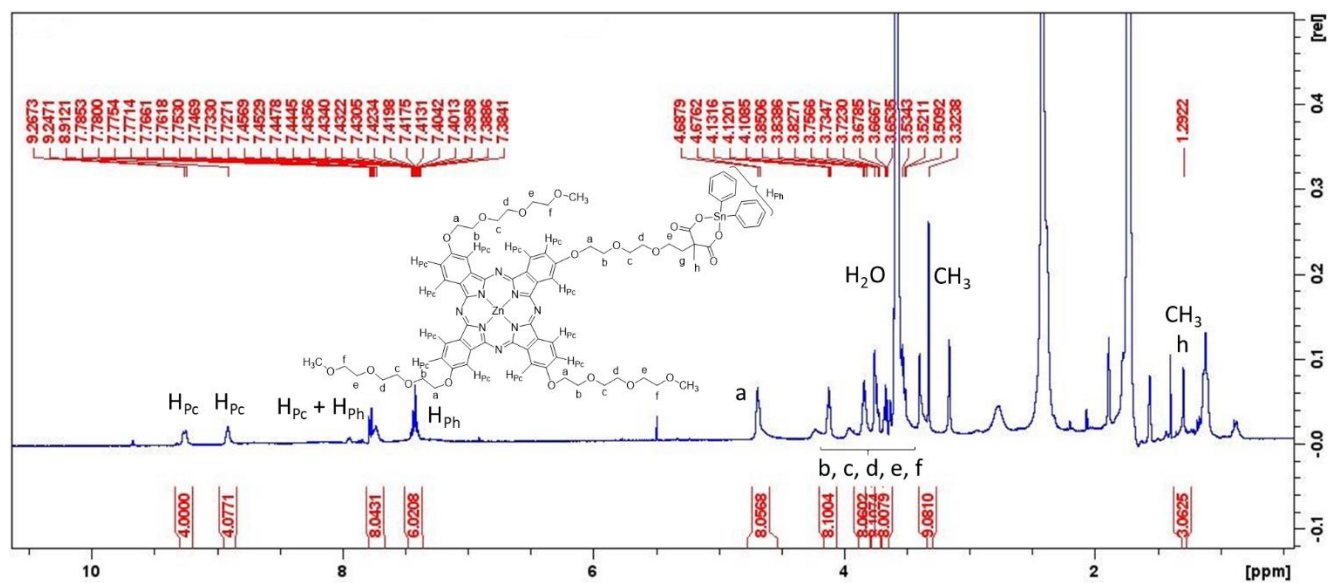

**Figure S8.**  $^1\text{H}$  NMR spectrum of compound **ZnPc-SnPh<sub>2</sub>** recorded in THF- $\text{d}_8$ .

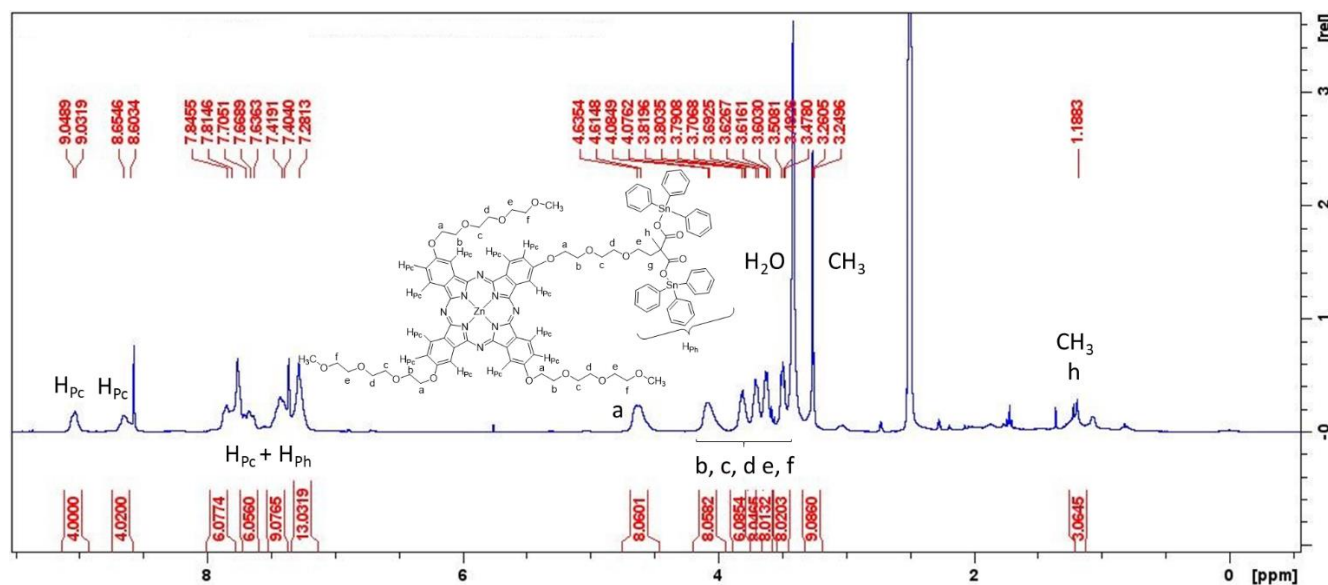

**Figure S9.**  $^1\text{H}$  NMR spectrum of compound **ZnPc-Sn<sub>2</sub>Ph<sub>6</sub>** recorded in DMSO- $\text{d}_6$  with a trace of pyridine.
